# Supplementary material
Source: PubMed Central journal article supplement (PMC3256907)
Supplement: supp_M111.294280_jbc.M111.294280-1.pdf [file supp_M111.294280_jbc.M111.294280-1.pdf]

## Supplemental Information:

### 1. Primers used in Figure 5A and 5B for making GST-tagged ProTα mutant constructs

#### 1) GST- ProTαΔADΔNLS ( GST-ProTα 1-40)

Forward: 5' CAGGAGCCGGATCCATGTCAGACGCAGCCGTAGA 3'

Reverse: 5' TCAATGGCGGCCGCATTAGCATTCCCGTTAGCAG 3'

#### 2) GST- ProTαΔNLS (GST-ProTα 1-83)

Forward: 5' CAGGAGCCGGATCCATGTCAGACGCAGCCGTAGA 3'

Reverse: 5' TCAATGGCGGCCGCTTCCTCATCTTCATCTCCAT 3'

#### 3) GST- ProTαΔBD (GST-ProTα 41-110)

Forward: 5' CAGGAGCCGGATCCGAGGAAAATGGGGAGCAGGA 3'

Reverse: 5' TCAATGGCGGCCGCCTAGTCATCCTCGTCGGTCT 3'

#### 4) GST- ProTαΔBDΔAD (GST-ProTα 71-110)

Forward: 5' CAGGAGCCGGATCCGGTGAGGAAGAGGATGGAGA 3'

Reverse: 5' TCAATGGCGGCCGCCTAGTCATCCTCGTCGGTCT 3'

#### 5) GST- ProTαΔBDΔNLS (GST-ProTα 41-83)

Forward: 5' CAGGAGCCGGATCCGAGGAAAATGGGGAGCAGGA 3'

Reverse: 5' TCAATGGCGGCCGCTTCCTCATCTTCATCTCCAT 3'

### 2. Primers used in Figure 5C for making non-tagged ProTα mutant constructs by replacing GFP insert in pCMV-GFP (Addgene, plasmid # 11153) with mutant ProTα inserts

#### 1) ProTαΔADΔNLS (ProTα 1-40)

Forward: 5' CAGGAGCCGAATTCATGTCAGACGCAGCCGTAGA 3'

Reverse: 5' TCAATGGCGGCCGCATTAGCATTCCCGTTAGCAG 3'

#### 2) ProTαΔNLS (ProTα 1-83)

Forward: 5' CAGGAGCCGAATTCATGTCAGACGCAGCCGTAGA 3'

Reverse: 5' TCAATGGCGGCCGCTTCCTCATCTTCATCTCCAT 3'

#### 3) ProTαΔBD (ProTα 41-110)

Forward: 5' CAGGAGCC GAATTCGAGGAAAATGGGGAGCAGGA 3'

Reverse: 5' TCAATGGCGGCCGCCTAGTCATCCTCGTCGGTCT 3'

#### 4) ProTαΔBDΔAD (ProTα 71-110)

Forward: 5' CAGGAGCCGAATTCGGTGAGGAAGAGGATGGAGA 3'

Reverse: 5' TCAATGGCGGCCGCCTAGTCATCCTCGTCGGTCT 3'

#### 5) ProTαΔBDΔNLS (ProTα 41-83)

Forward: 5' CAGGAGCC GAATTCGAGGAAAATGGGGAGCAGGA 3'

Reverse: 5' TCAATGGCGGCCGCTTCCTCATCTTCATCTCCAT 3'
